# Supplementary material for: Monogenic gene variants in lung transplant recipients with usual interstitial pneumonia
Source: PubMed Central journal article supplement — ERJ Open Res. 2022 Jan 24;8(1):00583-2021. doi: 10.1183/23120541.00583-2021 (PMC8784759; doi:10.1183/23120541.00583-2021), 2022-01-24
Supplement: 00583-2021.SUPPLEMENT.pdf [file 00583-2021.SUPPLEMENT.pdf]

## Supplement 1.

| Gene     | Associated phenotypes                                                                                                                                                         | Inheritance | ClinVar | HGMD |
|----------|-------------------------------------------------------------------------------------------------------------------------------------------------------------------------------|-------------|---------|------|
| ABCA3    | Interstitial lung disease, Surfactant metabolism dysfunction, pulmonary                                                                                                       | AD/AR       | 11      | 287  |
| ARHGEF1  | Idiopathic bronchiectasis, Immunodeficiencies with antibody defects                                                                                                           | AR          |         | 1    |
| C11ORF70 | Primary ciliary dyskinesia                                                                                                                                                    | AR          |         | 5    |
| CCDC39   | Ciliary dyskinesia                                                                                                                                                            | AR          | 39      | 47   |
| CCDC40   | Ciliary dyskinesia                                                                                                                                                            | AR          | 33      | 43   |
| CFTR     | Cystic fibrosis, Congenital bilateral absence of the vas deferens                                                                                                             | AD/AR       | 518     | 1803 |
| CHAT     | Myasthenic syndrome, congenital                                                                                                                                               | AR          | 24      | 73   |
| CHRNA1   | Myasthenic syndrome, congenital                                                                                                                                               | AD/AR       | 28      | 35   |
| CHRNA1   | Myasthenic syndrome                                                                                                                                                           | AD/AR       | 11      | 11   |
| CHRNA1   | Myasthenic syndrome                                                                                                                                                           | AD/AR       | 18      | 26   |
| CHRNA1   | Myasthenic syndrome                                                                                                                                                           | AD/AR       | 48      | 134  |
| COLQ     | Myasthenic syndrome, congenital                                                                                                                                               | AR          | 23      | 67   |
| CSF2RA#* | Surfactant metabolism dysfunction, pulmonary                                                                                                                                  | XL          | 2       | 17   |
| CSF2RB   | Surfactant metabolism dysfunction, pulmonary, 5                                                                                                                               | AR          | 2       | 6    |
| DKC1     | Hoyeraal-Hreidarsson syndrome, Dyskeratosis congenita                                                                                                                         | XL          | 48      | 74   |
| DNAAF1   | Ciliary dyskinesia                                                                                                                                                            | AR          | 19      | 38   |
| DNAAF2   | Ciliary dyskinesia                                                                                                                                                            | AR          | 13      | 6    |
| DNAH1    | Spermatogenic failure 18                                                                                                                                                      | AR          | 15      | 32   |
| DNAH11*  | Ciliary dyskinesia                                                                                                                                                            | AR          | 66      | 130  |
| DNAH5    | Ciliary dyskinesia                                                                                                                                                            | AR          | 140     | 197  |
| DNAH9    | Primary ciliary dyskinesia                                                                                                                                                    | AR          |         | 6    |
| DNAI1    | Ciliary dyskinesia                                                                                                                                                            | AR          | 17      | 35   |
| DNAI2    | Ciliary dyskinesia                                                                                                                                                            | AR          | 19      | 6    |
| DNAL1    | Ciliary dyskinesia                                                                                                                                                            | AR          | 3       | 1    |
| EDN3     | Hirschsprung disease, Central hypoventilation syndrome, congenital, Waardenburg syndrome                                                                                      | AD/AR       | 7       | 21   |
| EFEMP2   | Cutis laxa                                                                                                                                                                    | AR          | 14      | 16   |
| ELMOD2   | Familial idiopathic pulmonary fibrosis                                                                                                                                        | AD/AR       |         |      |
| ELN      | Cutis laxa, Supravalvular aortic stenosis                                                                                                                                     | AD          | 78      | 113  |
| FAM111B* | Hereditary Fibrosing Poikiloderma with Tendon Contracture, Myopathy, and Pulmonary Fibrosis, Lung cancer, familial, susceptibility to                                         | AD          | 7       | 7    |
| FBLN5    | Cutis laxa, Macular degeneration, age-related                                                                                                                                 | AD/AR       | 13      | 22   |
| FLCN     | Birt-Hogg-Dube syndrome, Pneumothorax, primary spontaneous                                                                                                                    | AD          | 154     | 210  |
| FOXF1    | Alveolar capillary dysplasia with misalignment of pulmonary veins                                                                                                             | AD          | 10      | 102  |
| GAS2L2   | Primary ciliary dyskinesia                                                                                                                                                    | AR          |         | 3    |
| GAS8     | Ciliary dyskinesia, primary, 33                                                                                                                                               | AR          |         | 4    |
| GLRA1    | Hyperplexia                                                                                                                                                                   | AD/AR       | 39      | 69   |
| HPS1*    | Hermansky-Pudlak syndrome                                                                                                                                                     | AR          | 28      | 55   |
| HPS4     | Hermansky-Pudlak syndrome                                                                                                                                                     | AR          | 16      | 22   |
| ITGA3    | Interstitial lung disease with nephrotic syndrome and epidermolysis bullosa                                                                                                   | AR          | 6       | 11   |
| LTBP4    | Cutis laxa with severe pulmonary, gastrointestinal, and urinary abnormalities                                                                                                 | AR          | 10      | 17   |
| MCIDAS   | Primary ciliary dyskinesia                                                                                                                                                    | AR          | 4       | 3    |
| MECP2    | Angelman-like syndrome, Autism, Rett syndrome, Encephalopathy, Mental retardation                                                                                             | XL          | 506     | 1039 |
| NAF1     |                                                                                                                                                                               | AD          |         | 2    |
| NF1*     | Watson syndrome, Neurofibromatosis, Neurofibromatosis-Noonan syndrome                                                                                                         | AD          | 1157    | 2901 |
| NKX2-1   | Thyroid cancer, nonmedullary, Choreoathetosis, hypothyroidism, and neonatal respiratory distress, Chorea, hereditary benign                                                   | AD          | 27      | 137  |
| NME8     | Ciliary dyskinesia                                                                                                                                                            | AR          | 1       | 6    |
| PARN*    | Pulmonary fibrosis and/or bone marrow failure, Dyskeratosis congenita                                                                                                         | AD/AR       | 15      | 29   |
| PHOX2B   | Central hypoventilation syndrome, congenital, Neuroblastoma, susceptibility to, Neuroblastoma with Hirschsprung disease                                                       | AD          | 11      | 86   |
| PIHI D3  | Ciliary dyskinesia, primary, 36                                                                                                                                               | XL          | 2       | 12   |
| POLD1    | Colorectal cancer, Mandibular hypoplasia, deafness, progeroid features, and lipodystrophy syndrome, Idiopathic bronchiectasis, Immunodeficiency                               | AD/AR       | 3       | 31   |
| RAPSN    | Myasthenic syndrome, congenital                                                                                                                                               | AR          | 26      | 58   |
| RET      | Hirschsprung disease, Central hypoventilation syndrome, congenital, Pheochromocytoma, Medullary thyroid carcinoma, Multiple endocrine neoplasia                               | AD/AR       | 122     | 407  |
| RSPH3    | Ciliary dyskinesia, primary, 32                                                                                                                                               | AR          | 7       | 5    |
| RSPH4A   | Ciliary dyskinesia                                                                                                                                                            | AR          | 18      | 24   |
| RSPH9    | Ciliary dyskinesia                                                                                                                                                            | AR          | 8       | 12   |
| RTEL1    | Pulmonary fibrosis and/or bone marrow failure, Dyskeratosis congenita                                                                                                         | AD/AR       | 58      | 51   |
| SCN4A    | Hyperkalemic periodic paralysis, Myotonia, potassium-aggravated, Paramyotonia congenita, Myasthenic syndrome, congenital, Normokalemic potassium-sensitive periodic paralysis | AD/AR       | 57      | 126  |
| SCNN1A   | Pseudohypoaldosteronism, Bronchiectasis with or without elevated sweat chloride                                                                                               | AD/AR       | 10      | 44   |
| SCNN1B   | Liddle syndrome, Pseudohypoaldosteronism, Bronchiectasis with or without elevated sweat chloride                                                                              | AD/AR       | 19      | 47   |
| SERPINA1 | Alpha-1-antitrypsin deficiency                                                                                                                                                | AR          | 49      | 80   |
| SFTPA1   | Idiopathic pulmonary fibrosis                                                                                                                                                 | AD          |         | 2    |
| SFTPA2   | Pulmonary fibrosis, idiopathic                                                                                                                                                | AD          | 2       | 5    |
| SFTPB    | Surfactant metabolism dysfunction, pulmonary                                                                                                                                  | AR          | 5       | 28   |
| SFTPC    | Surfactant metabolism dysfunction, pulmonary                                                                                                                                  | AD          | 8       | 82   |
| SLC34A2  | Pulmonary alveolar microlithiasis                                                                                                                                             | AR          | 5       | 19   |
| SLC6A5   | Hyperplexia                                                                                                                                                                   | AR          | 15      | 33   |
| SLC7A7   | Lysinuric protein intolerance                                                                                                                                                 | AR          | 55      | 67   |
| SMPD1    | Niemann-Pick disease                                                                                                                                                          | AR          | 110     | 249  |
| STAT3    | Hyper-IgE recurrent infection syndrome, Autoimmune disease, multisystem, infantile onset                                                                                      | AD          | 47      | 152  |
| STK36    | Primary ciliary dyskinesia                                                                                                                                                    | AR          |         | 5    |
| STRA6    | Microphthalmia, syndromic, Microphthalmia, isolated, with coloboma                                                                                                            | AR          | 22      | 33   |
| TERC     | Aplastic anemia, Pulmonary fibrosis and/or bone marrow failure, telomere-related, Dyskeratosis congenita                                                                      | AD          | 42      | 73   |
| TERT     | Aplastic anemia, Pulmonary fibrosis and/or bone marrow failure, telomere-related, Dyskeratosis congenita                                                                      | AD/AR       | 48      | 156  |
| TINF2    | Revesz syndrome, Dyskeratosis congenita                                                                                                                                       | AD          | 25      | 42   |
| TMEM173  | STING-associated vasculopathy, infantile-onset (SAVI)                                                                                                                         | AD          | 4       | 10   |
| TSC1     | Lymphangiomyomatosis, Tuberous sclerosis                                                                                                                                      | AD          | 177     | 372  |
| TSC2     | Lymphangiomyomatosis, Tuberous sclerosis                                                                                                                                      | AD          | 396     | 1195 |
| ZEB2*    | Mowat-Wilson syndrome                                                                                                                                                         | AD          | 154     | 287  |

\* Some, or all, of the gene is duplicated in the genome. Read more.

# The gene has suboptimal coverage (means <90% of the gene's target nucleotides are covered at >20x with mapping quality score (MQ)>20 reads), and/or the gene has exons listed under Test limitations section that are not included in the panel

The sensitivity to detect variants may be limited in genes marked with an asterisk (\*) or number sign (#)

Gene refers to the HGNC approved gene symbol; Inheritance refers to inheritance patterns such as autosomal dominant (AD), autosomal recessive (AR), mitochondrial (mi), X-linked (XL), X-linked dominant (XLD) and X-linked recessive (XLR); ClinVar refers to the number of variants in the gene classified as pathogenic or likely pathogenic in this database (ClinVar); HGMD refers to the number of variants with possible disease association in the gene listed in Human Gene Mutation Database (HGMD). The list of associated, gene specific phenotypes are generated from CGD or Mitomap databases.
